# Supplementary material for: Orbital hybridization-induced band offset phenomena in NixCd1−xO thin films
Source: Royal Society of Chemistry journal article supplement (doi:10.1039/c9nr05184h), 2019-12-12
Supplement: c9nr05184h1.pdf [file c9nr05184h1.pdf]

## **Orbital hybridization induced band offset phenomena in $\text{Ni}_x\text{Cd}_{1-x}\text{O}$ thin films**

**Arkaprava Das<sup>a\*</sup>, Deobrat Singh<sup>b</sup>, C. P. Saini<sup>a</sup>, Rajeev Ahuja<sup>b</sup>, Anumeet Kaur<sup>c</sup>,  
Sergei Aliukov<sup>d</sup>**

<sup>a</sup>Inter University Accelerator Centre, Aruna Asaf Ali Marg, New Delhi-110067, India

<sup>b</sup>Department of Physics and Astronomy, Condensed Matter Theory Group, Uppsala University, Sweden

<sup>c</sup>Department of Physics, Guru Nanak Dev University, Amritsar, India

<sup>d</sup>South Ural State University, Chelyabinsk, Russia

*Authors for correspondence:* [\\*arkapravadas222@gmail.com](mailto:*arkapravadas222@gmail.com)

**Table (S1):** Calculated and obtained numerical values of different parameters

| Sample name | 2 $\theta$ Position of (111) peak (degree) | FWHM of (111) peak | 2 $\theta$ Position of (220) peak (degree) | Effective reduced mass (atomic weight) | Compositional percentage from RBS measurements |      |      |
|-------------|--------------------------------------------|--------------------|--------------------------------------------|----------------------------------------|------------------------------------------------|------|------|
|             |                                            |                    |                                            |                                        | Cd%                                            | O%   | Ni%  |
| 4Cd         | 33.06                                      | 0.42               | 55.42                                      | 14.00                                  | 49.8                                           | 49.2 | 0    |
| 3% Ni       | 33.04                                      | 0.60               | 55.43                                      | 13.98                                  | 49                                             | 49   | 1.9  |
| 5% Ni       | 33.10                                      | 0.63               | 55.44                                      | 13.96                                  | 46.6                                           | 49.9 | 3.4  |
| 10% Ni      | 33.13                                      | 0.88               | 55.51                                      | 13.92                                  | 44.3                                           | 50   | 5.9  |
| 20% Ni      | 33.24                                      | 0.87               | 55.66                                      | 13.82                                  | 36.5                                           | 52.9 | 10.6 |
| 40% Ni      | 33.34                                      | 1.39               | 56.04                                      | 13.60                                  | 24.1                                           | 51.9 | 24.1 |
| 80% Ni      | <i>n.a.</i>                                | <i>n.a.</i>        | <i>n.a.</i>                                | 13.00                                  | 5.1                                            | 57.7 | 37.2 |
| 100% Ni     | <i>n.a.</i>                                | <i>n.a.</i>        | <i>n.a.</i>                                | 12.57                                  | 0                                              | 58.1 | 41.9 |

**n.a.** = Not Applicable

**Table (S2):** Carrier concentration value with increasing Ni doping percentage for Ni<sub>x</sub>Cd<sub>1-x</sub>O thin films

| Sample name | Carrier concentration (/cc) |
|-------------|-----------------------------|
| 4Cd         | -8.400E+19                  |
| 3% Ni       | -6.587E+19                  |
| 5% Ni       | -5.487E+19                  |
| 10% Ni      | -2.196E+19                  |
| 20% Ni      | -1.887E+19                  |
| 40% Ni      | N.A.                        |

Reference: Arkaprava Das *et al.*, Electronic excitation induced anomalous band gap enhancement in Ni<sub>x</sub>Cd<sub>1-x</sub>O thin films; Vacuum 146 (2017) 287-296

**Table (S3):** Fitting parameters for O 1s, Ni 2p and Cd 3d XPS spectra

| sample                                  | Peak position (eV) | area  | fwhm |
|-----------------------------------------|--------------------|-------|------|
| 4Cd (Cd 3d)                             |                    |       |      |
| CdO                                     | 403.5              | 58900 | 1.46 |
| CdO <sub>2</sub>                        | 404.4              | 22589 | 1.11 |
| 4Cd (O 1s)                              |                    |       |      |
| Cd(OH) <sub>2</sub> / CdCO <sub>3</sub> | 530.5              | 10978 | 1.64 |
| CdO                                     | 527.9              | 4704  | 0.91 |
| CdO <sub>2</sub>                        | 528.8              | 2709  | 1.29 |
| 5% Ni (Cd 3d)                           |                    |       |      |
| CdO                                     | 403.5              | 58307 | 1.45 |
| CdO <sub>2</sub>                        | 404.4              | 22352 | 1.09 |
| 5% Ni (O 1s)                            |                    |       |      |
| Cd(OH) <sub>2</sub> / CdCO <sub>3</sub> | 530.5              | 10838 | 1.64 |
| CdO                                     | 527.9              | 4600  | 0.91 |
| CdO <sub>2</sub>                        | 528.8              | 2689  | 1.29 |
| 5% Ni (Ni 2p)                           |                    |       |      |
| Ni <sup>0</sup>                         | 851.5              | 197   | 0.8  |
| Ni <sup>2+</sup>                        | 853.6              | 1259  | 3.1  |
| Satellite                               | 859.9              | 1143  | 5.8  |
| Satellite                               | 871.9              | 2198  | 13.9 |
|                                         |                    |       |      |
| 10% Ni (Cd 3d)                          |                    |       |      |
| CdO                                     | 403.4              | 53205 | 1.15 |
| CdO <sub>2</sub>                        | 404.3              | 31243 | 1.37 |
| 10% Ni (O 1s)                           |                    |       |      |
| Cd(OH) <sub>2</sub> / CdCO <sub>3</sub> | 530.6              | 7728  | 1.74 |
| CdO                                     | 528.1              | 8263  | 0.93 |
| CdO <sub>2</sub>                        | 528.9              | 1982  | 0.94 |
| 10% Ni (Ni 2p)                          |                    |       |      |
| Ni <sup>0</sup>                         | 851.6              | 2771  | 1.09 |
| Ni <sup>2+</sup>                        | 853.6              | 5492  | 2.9  |
| Satellite                               | 859.7              | 7844  | 7.3  |
| Satellite                               | 871.1              | 5605  | 6.1  |
| Satellite                               | 878.5              | 3302  | 6.2  |
| 40% Ni (Cd 3d)                          |                    |       |      |
| CdO                                     | 403.6              | 15848 | 1.24 |
| CdO <sub>2</sub>                        | 404.5              | 10064 | 1.23 |
| 40% Ni (O 1s)                           |                    |       |      |

|                                         |       |       |      |
|-----------------------------------------|-------|-------|------|
| Cd(OH) <sub>2</sub> / CdCO <sub>3</sub> | 530.5 | 7646  | 1.86 |
| CdO                                     | 528.4 | 4173  | 1.09 |
| CdO <sub>2</sub>                        | 528.8 | 1958  | 0.84 |
| 40% Ni (Ni 2p)                          |       |       |      |
| Ni <sup>0</sup>                         | 851.8 | 9828  | 0.9  |
| Ni <sup>2+</sup>                        | 852.8 | 19043 | 2.9  |
| Ni <sup>3+</sup>                        | 855.3 | 5381  | 2.4  |
| Satellite                               | 859.4 | 19027 | 6.6  |
| Satellite                               | 872.0 | 19131 | 9    |
| Satellite                               | 879.6 | 4444  | 5    |
|                                         |       |       |      |
| 100% Ni (O 1s)                          |       |       |      |
| NiO                                     | 529.7 | 12248 | 1.14 |
| Ni(OH) <sub>2</sub>                     | 531.3 | 7300  | 1.92 |
| 100% Ni (Ni 2p)                         |       |       |      |
| Ni <sup>0</sup>                         | 852.5 | 12716 | 0.9  |
| Ni <sup>2+</sup>                        | 854   | 33000 | 2.8  |
| Ni <sup>3+</sup>                        | 856.4 | 13694 | 2.6  |
| Satellite                               | 860.5 | 37560 | 6.8  |
| Satellite                               | 873.3 | 33647 | 9.4  |
| Satellite                               | 880.8 | 8343  | 4.6  |
